# Supplementary material for: Extraction and Fractionation of Bioactives from Dipsacus fullonum L. Leaves and Evaluation of Their Anti-Borrelia Activity
Source: MDPI journal article supplement (doi:10.3390/ph15010087), 2022-01-12

## Supplementary files

### Supplementary File S1 – Cytotoxic effect of DE and its fractions

| Bonferroni's multiple comparisons test | Mean Diff. | 95% CI of diff.  | Significant? | Summary |
|----------------------------------------|------------|------------------|--------------|---------|
| Control vs. DE                         | 79.80      | 59.69 to 99.91   | Yes          | ****    |
| Control vs. NP2-RP                     | 28.91      | 10.29 to 47.53   | Yes          | **      |
| Control vs. NP7                        | 45.33      | 25.22 to 65.44   | Yes          | ****    |
| Control vs. NP2                        | 36.69      | 16.58 to 56.80   | Yes          | ***     |
| DE vs. NP2-RP                          | -50.89     | -71.00 to -30.78 | Yes          | ****    |
| DE vs. NP7                             | -34.46     | -55.96 to -12.97 | Yes          | **      |
| DE vs. NP2                             | -43.10     | -64.60 to -21.61 | Yes          | ***     |
| NP2-RP vs. NP7                         | 16.42      | -3.686 to 36.53  | No           | ns      |
| NP2-RP vs. NP2                         | 7.783      | -12.33 to 27.89  | No           | ns      |
| NP7 vs. NP2                            | -8.640     | -30.14 to 12.86  | No           | ns      |

p< 0.01 as \*\*, p< 0.001 as \*\*\*, p< 0.0001 as \*\*\*\*

## Supplementary File S2 – NMR analysis results for NP2-RP

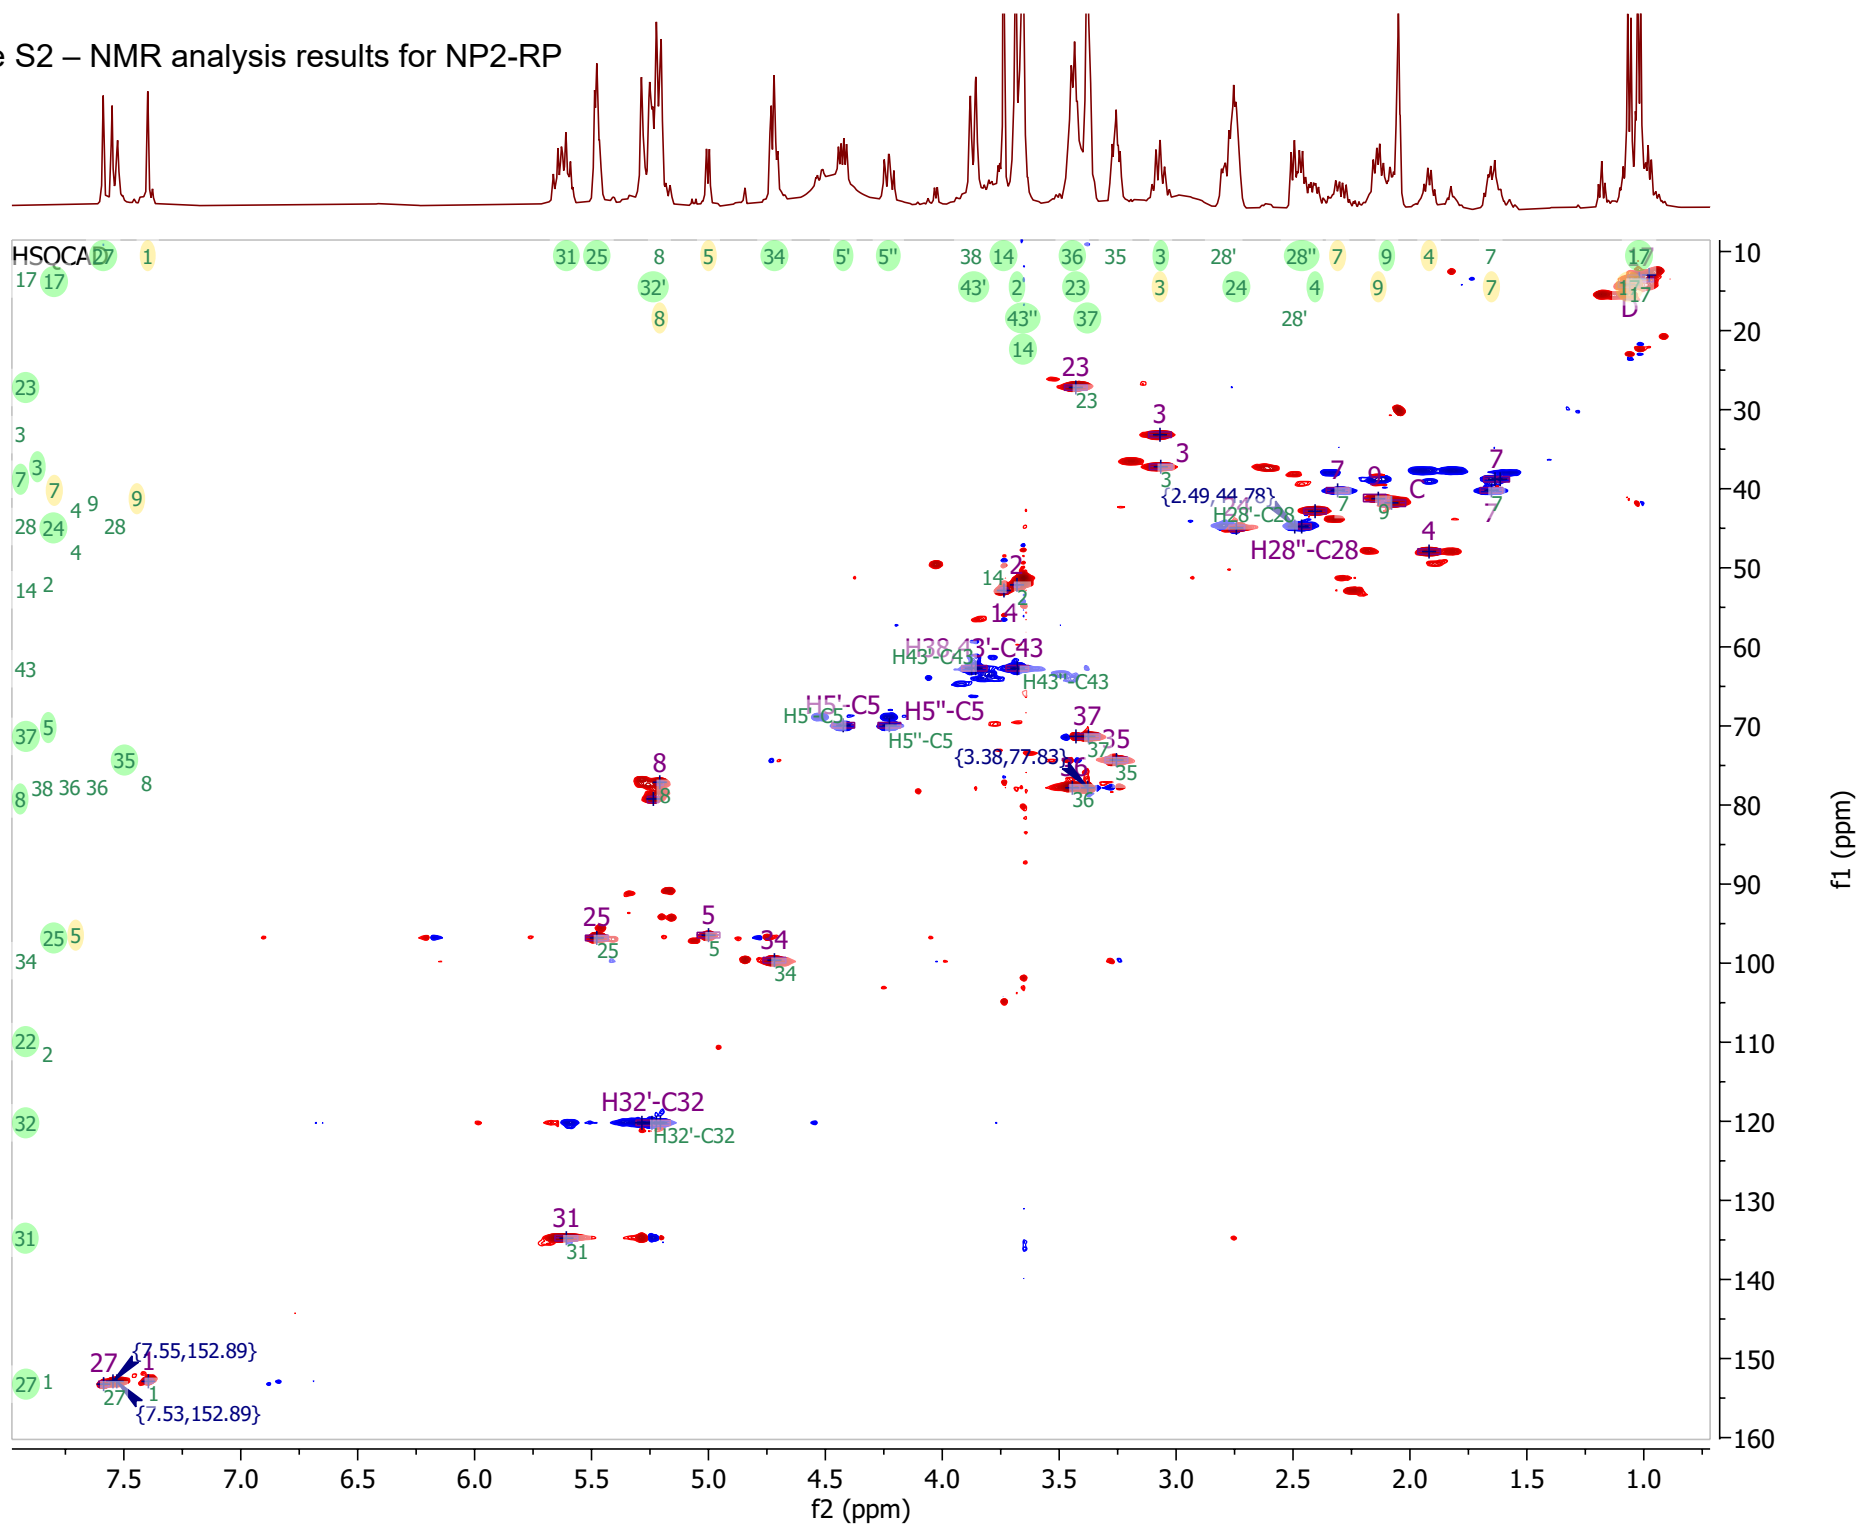

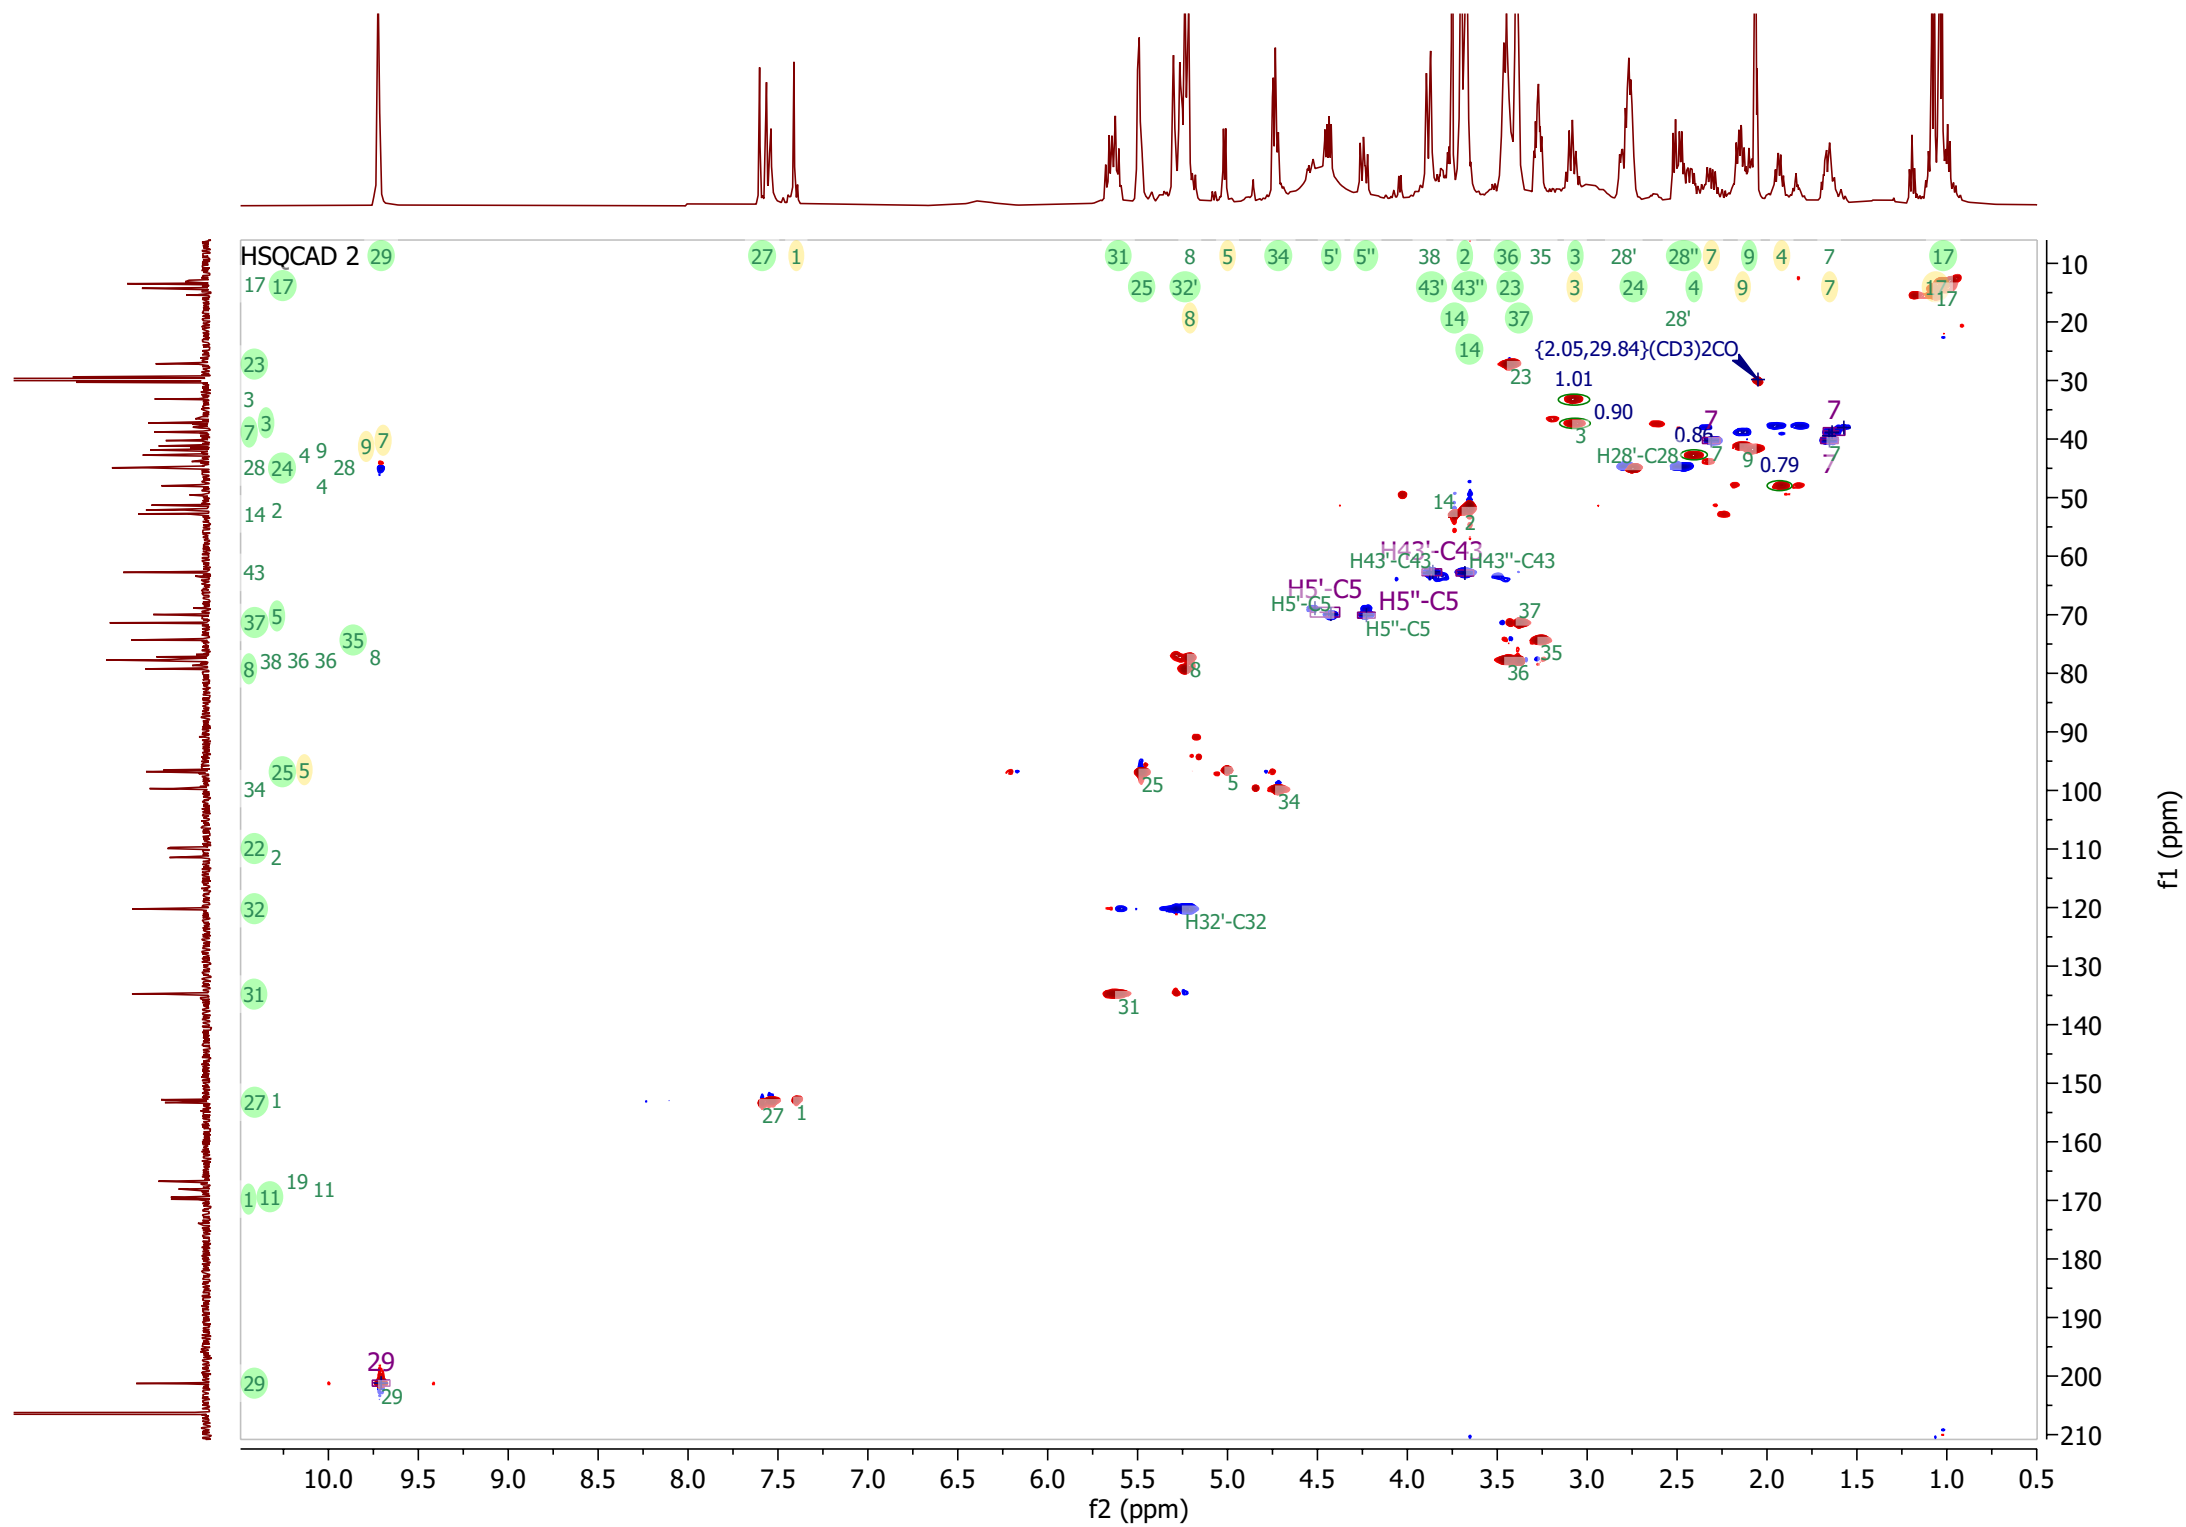

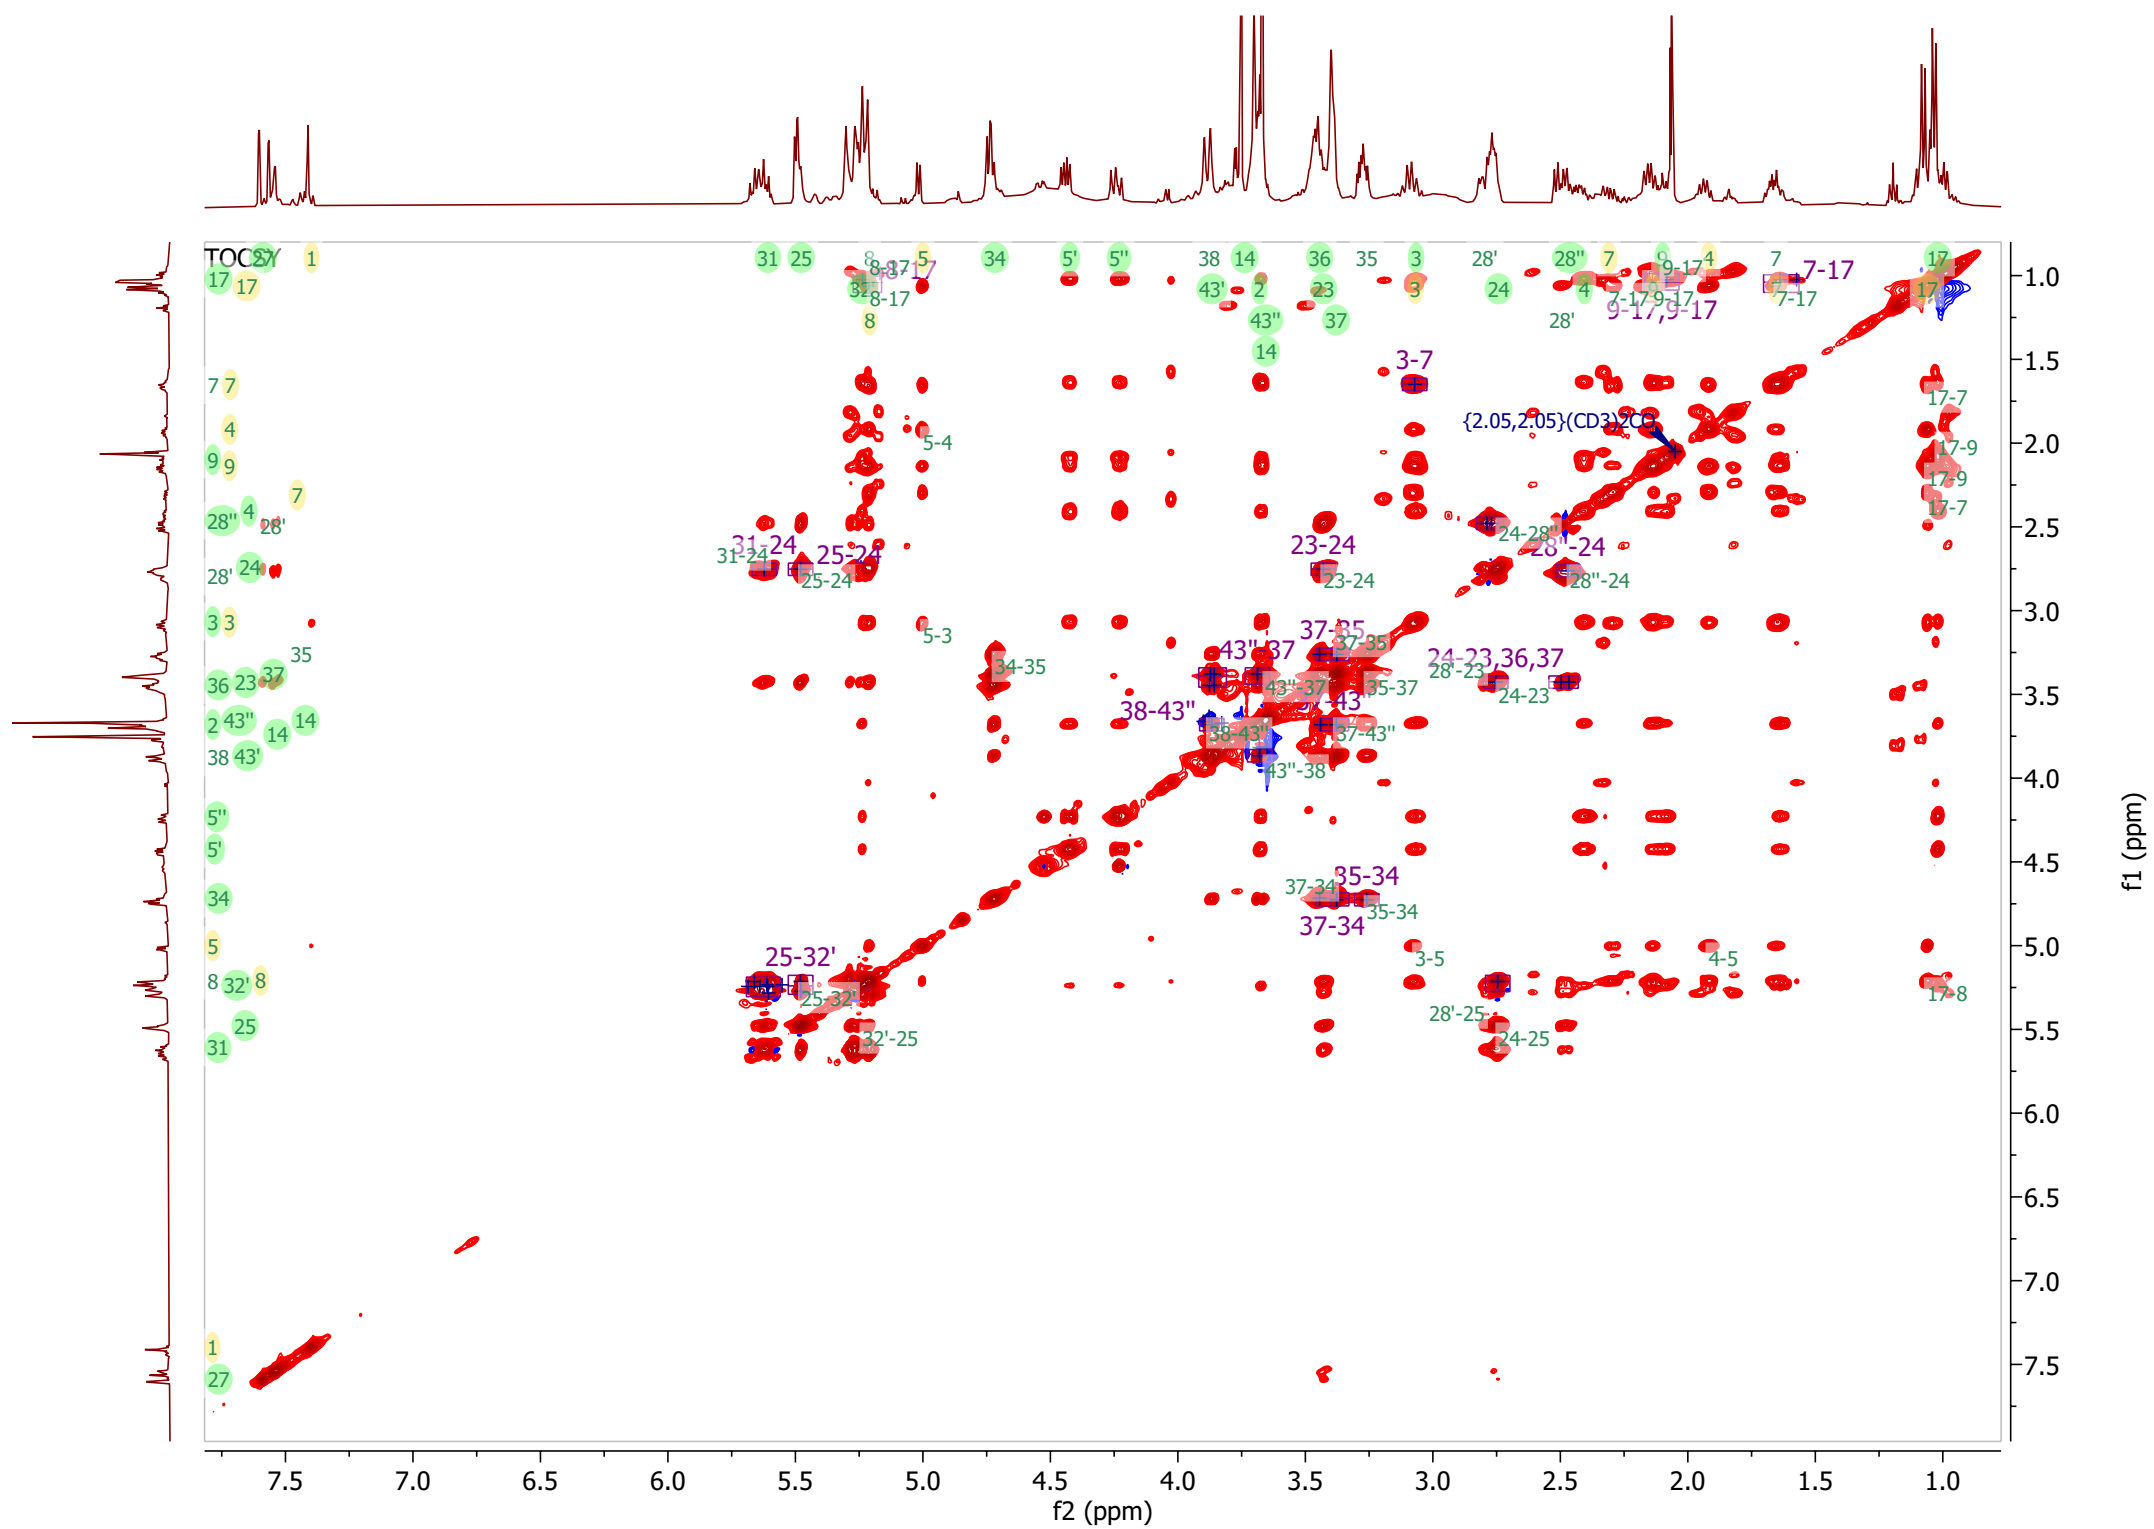

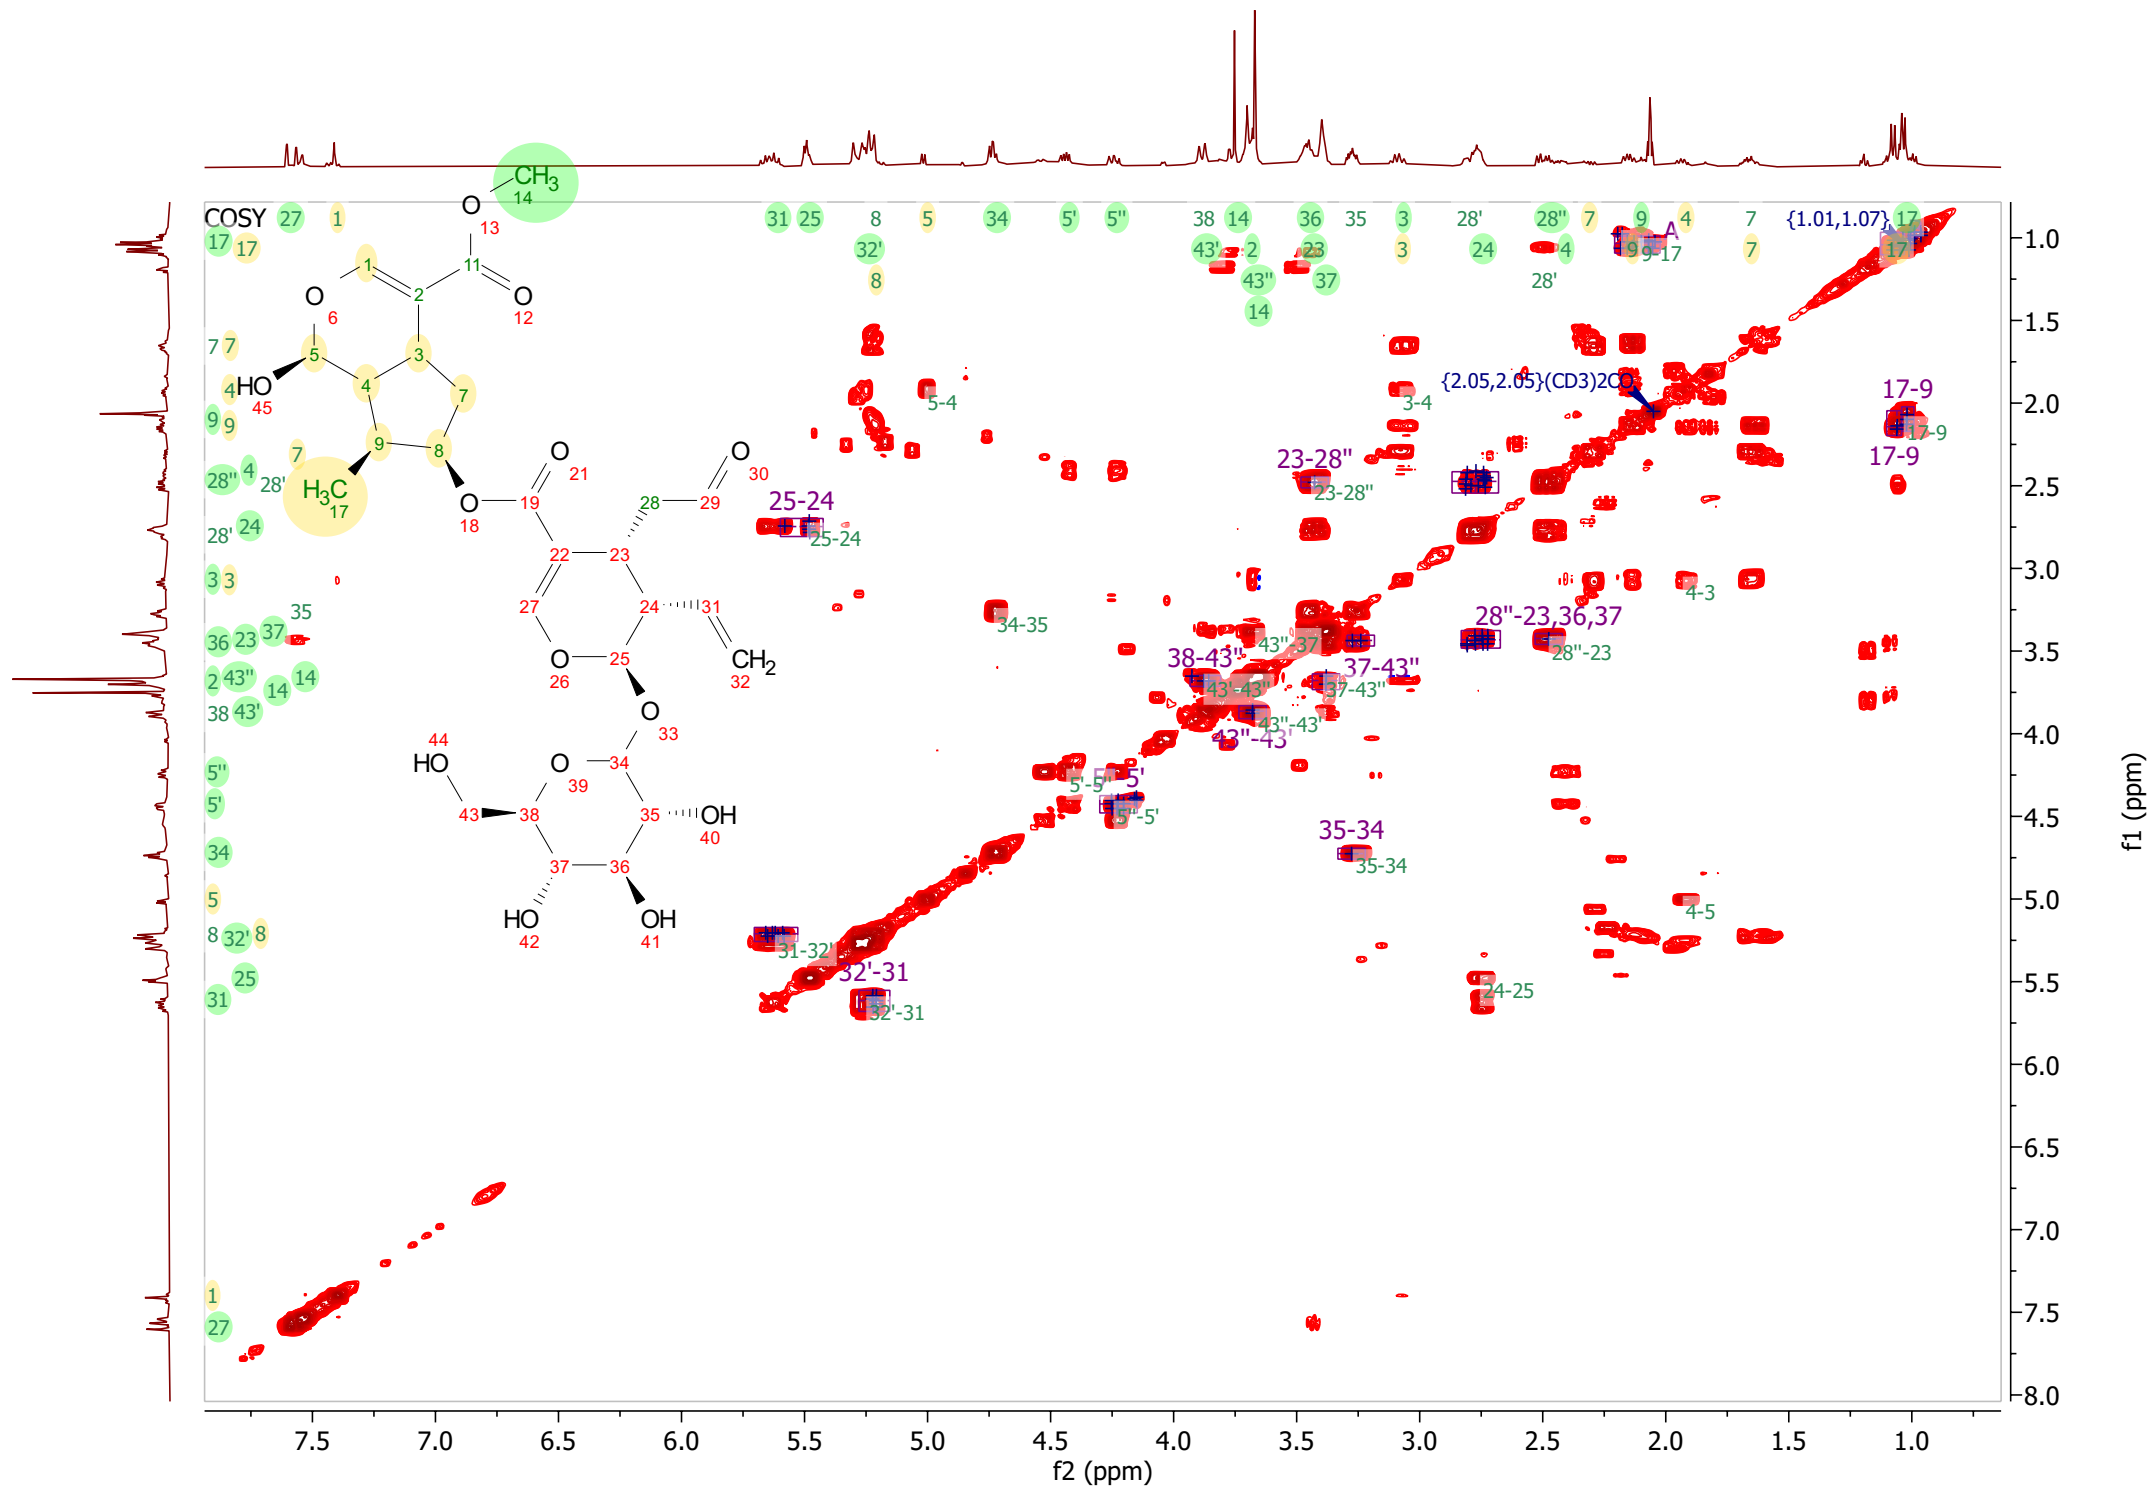

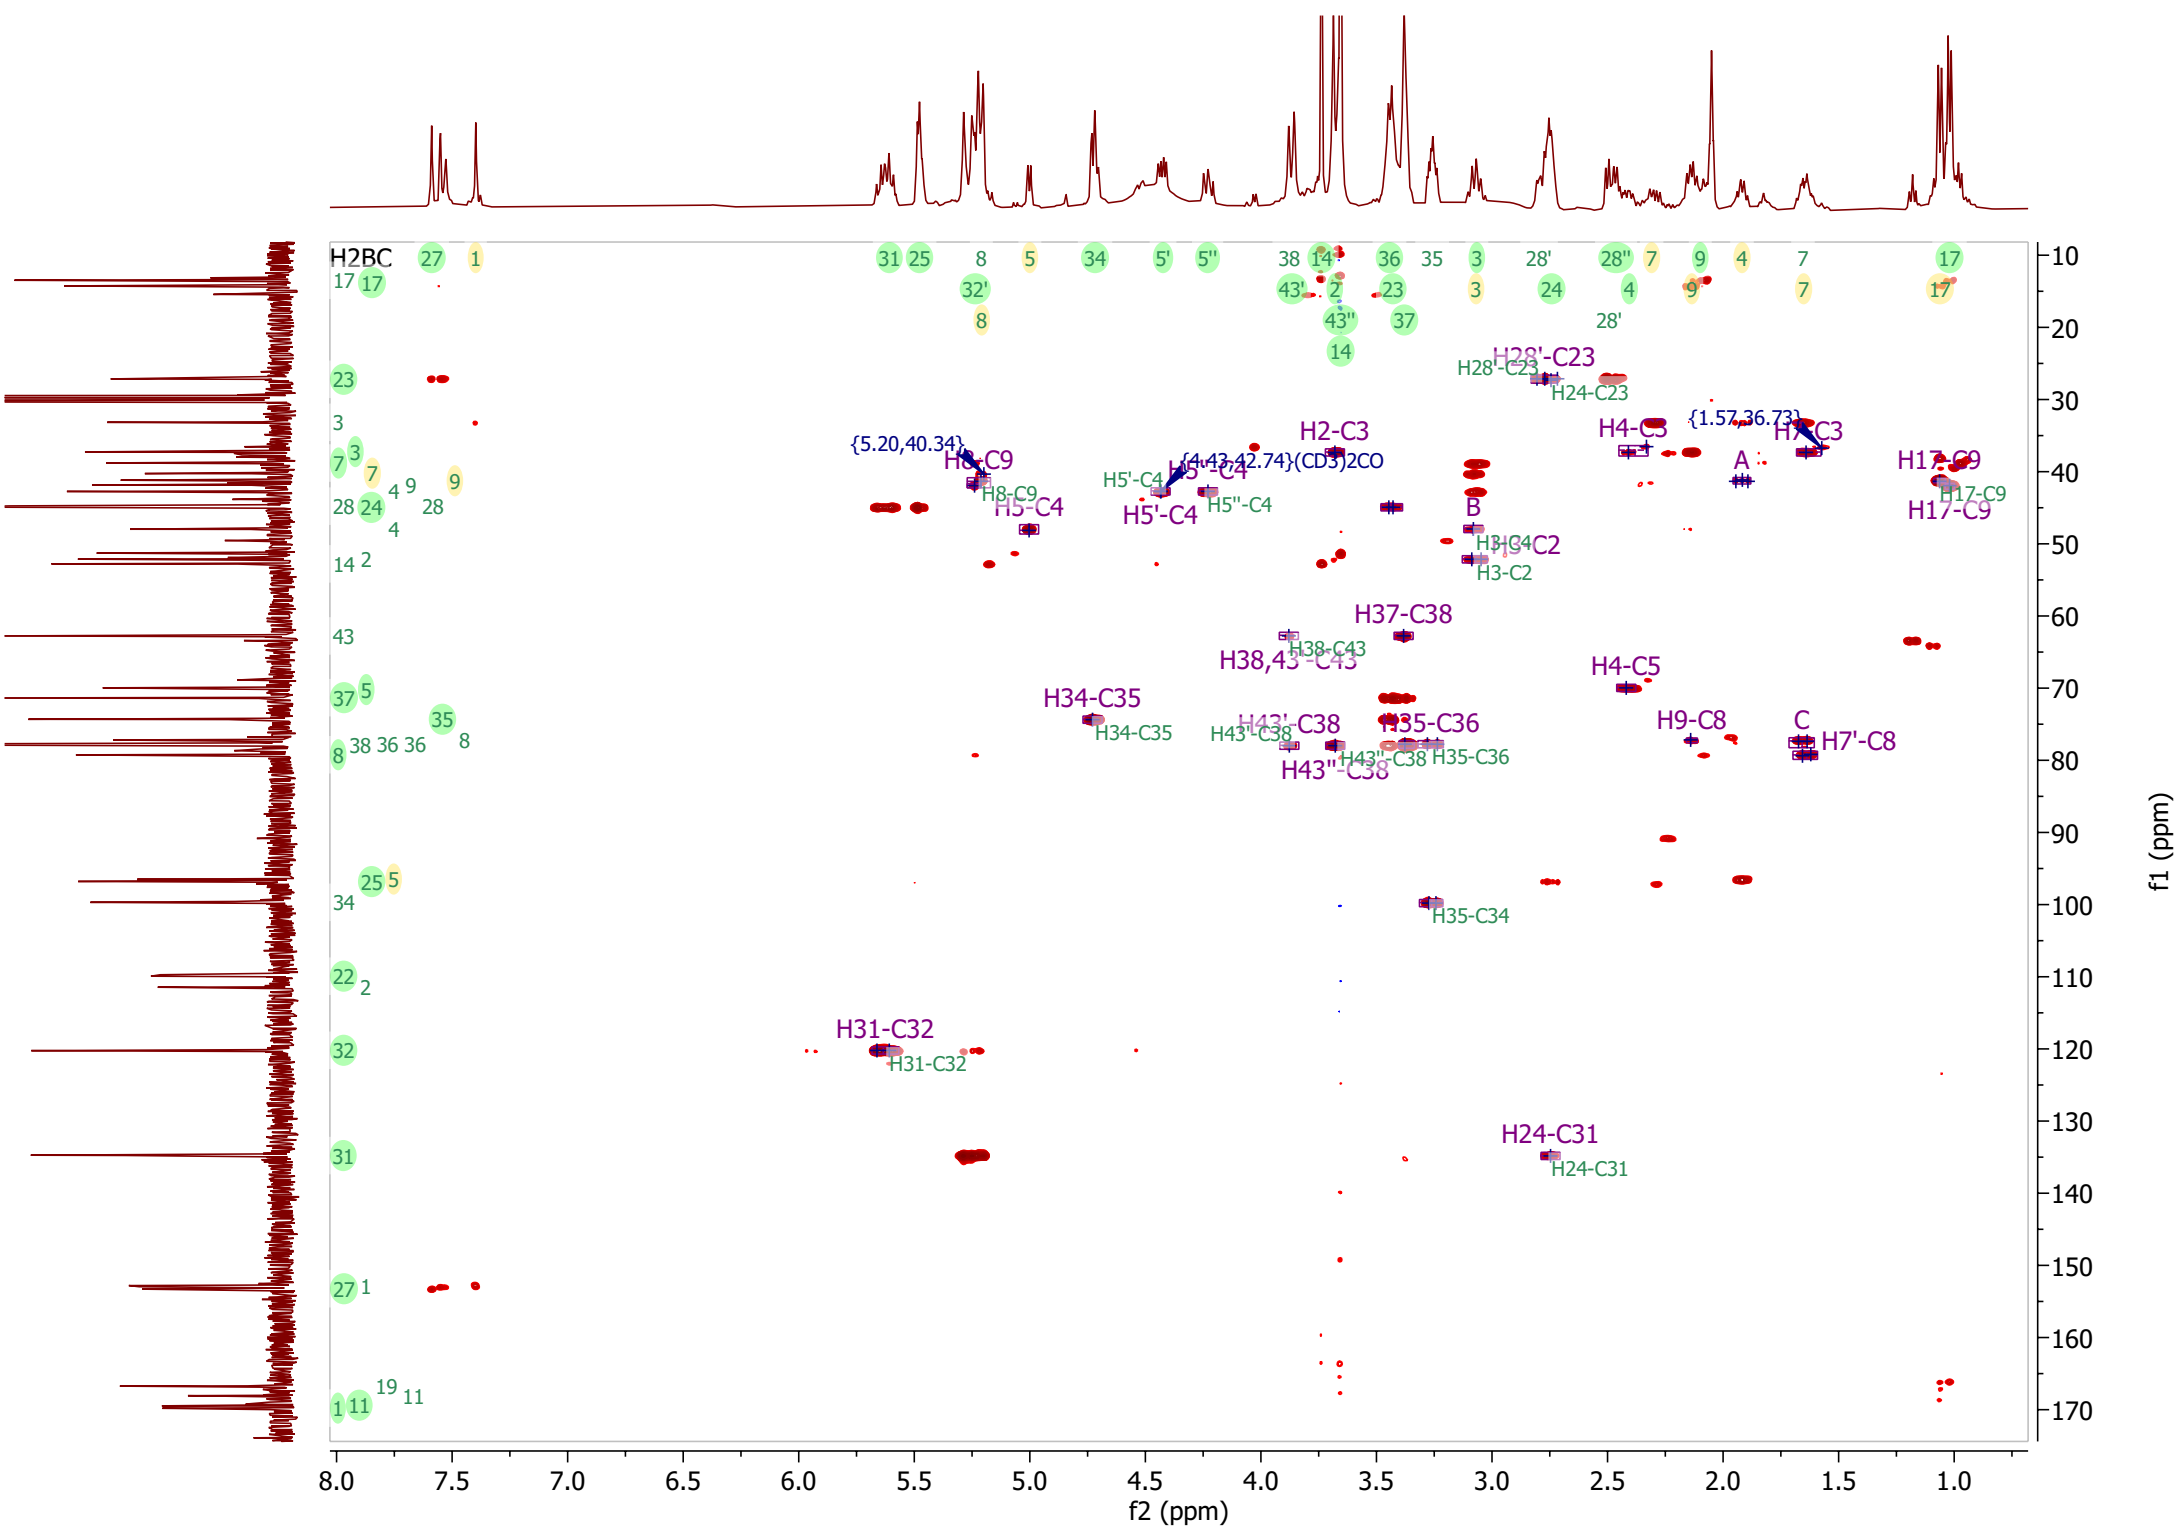

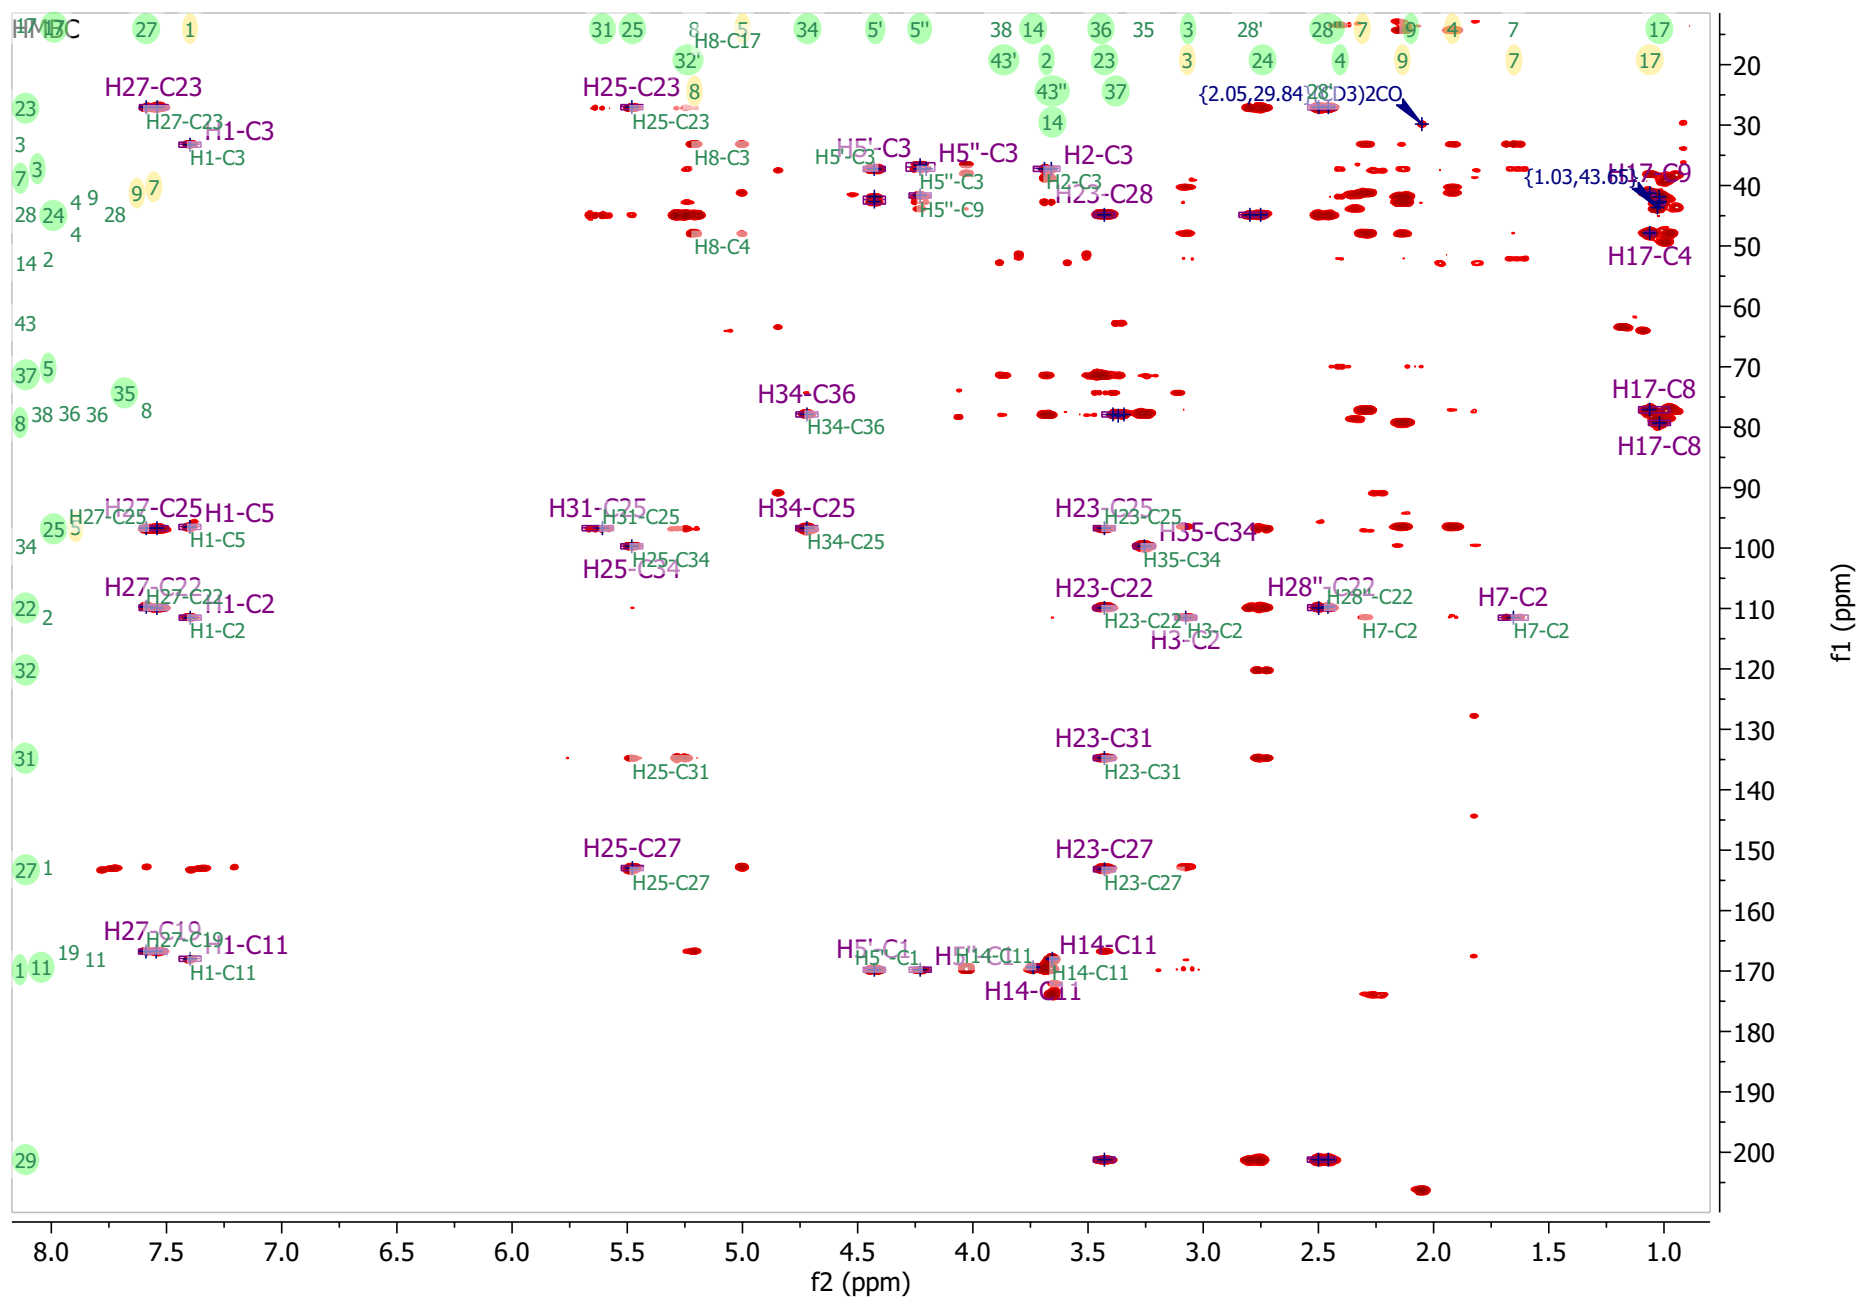

Supplement: s1 [file s1]
